# Supplementary material for: The complete mitochondrial genome of Paragonimus ohirai (Paragonimidae: Trematoda: Platyhelminthes) and its comparison with P. westermani congeners and other trematodes
Source: PubMed Central journal article supplement (PMC6589331; doi:10.7717/peerj.7031), 2019-06-20
Supplement: peerj-07-7031-s004.pdf [file peerj-07-7031-s004.pdf]

Pohi (14818 : AGGTTTCAGAGGTTTCAGAGTGGTATTTCAGTGCCTTTCCTATAGCAGGTTATGTTTGGTGGGTACGTTTTTAAATGGTTGGGTTGATTTGTTGATGAGAGTTTAGACTGGGTATTGGTGGGGTAGTAGTGTGGTTTCAAGCTTAGGCTGT : 12920  
\* 12940 \* 12960 \* 12980 \* 12980 \* 13000 \* 13020 \* 13040 \* 13060 \* 13080 \*  
Pohi (14818 : TTGATGGGGTTGTTGTTTGGTGTGTTTAGATCTGGTGTGGTGTGGTGTGAAATCTTTATTAAGGGTAGGGATGTTTGGTAGGTTTATTTATGATGGGTTTTTGAAGTAAACAGAGGTAGCGTTCCTTCTTTTATCGGTGGGACTTATATGTTGTC : 13090  
13100 \* 13120 \* 13140 \* 13160 \* 13180 \* 13200 \* 13220 \* **LR1** \* 13240 \*  
Pohi (14818 : ACTTTTAAAGCGTGGTGGATAATTCATTTAGAGGTTTTTACCTCTTGAATAATTGGTGTGGGTAGCGTTTTGATGATTTTTTGTCTCCTTTTTTGT; **LR1**GTGGTGGTT;**LR1**GGTAGTATATTGAGTAGATATCTCTCTCCAGTCCAG : 13260  
\* 13280 \* 13300 \* **I**> 13320 **LR1** \* 13340 \* 13360 \* 13380 \* 13400 \* 13420 \*  
Pohi (14818 : **GGCCATGTGTTTGGCTAGCATATATTATAGATTCTAAGTCTGTGGGTATAGGGAGTTTAAAAAATATCCGATGTTTCGTGTTAAATAATTCGTAGGGGGGGTATTGTGAAAAAATTTTGTAAATTGTAGCTTAGTACAGGTATTCTTGAAGAG : 13430**  
13440 \* 13460 \* 13480 \* 13500 \* 13520 \* 13540 \* 13560 \* 13580 \* 13600 \*  
Pohi (14818 : **AGAGCCCTGGGGGTTCCCTTAAATTTGGTATTAGGTAAAAAATTTTACTTTTAAAAAATTTAGTGGTCTTTTTCTGGTGGTTTGTGGGCAAAATTTGGTTTGTGGAACTGGGAATTGATTTACTATGATGATATATACATACAGTGGATTATAG : 13600**  
<**I** \* 13620 **LR1** \* 13640 \* **I**> 13660 **LR2** \* 13680 \* 13700 \* 13720 \* 13740 \*  
Pohi (14818 : **GTG**GATTGTTT;**LR1**CCGTAGGTTAGAGGGTTCCAGCTAAATTTCCGCTAGAGGGAGTTAAAAAATATCCGATCTCCTTTTAAATAATTCGTAGGGGGGGTATTGTGAAAAAATTTTGTAAATTTAGCTTAGTACAGGTATTCTTGAAGAG : 13770  
13780 \* 13800 \* 13820 \* 13840 \* 13860 \* 13880 \* 13900 \* 13920 \* 13940 \*  
Pohi (14818 : **AGATGGCCGTGGGTTCCCTTAAATTTAGCTTTTAGTGTAAAAAATTTTACTTTTAAAAAATTTTAGTGGGTTTTTTCTCGGTAGTTTGTGGGCAAAATTTGGTTTGTGGAACTGGGAATTGATTTACTATGATGATATATACATACAGTGGATTATAG : 13940**  
<**I** \* 13960 **LR1** \* 13980 \* 14000 \* 14020 \* 14040 \* 14060 \* 14080 **LR1** \* 14100 \*  
Pohi (14818 : **GTG**CTTCCCTCCATCTGGGTTTGGTAAATATTAGAAAGGGTAAAGGTAGATGTAAGTAGTGGTTTGTAGGATAGAAATCTCTAGCCAGCCCGGTGTGTTTGTGGGGGGGGAGAGGAGGTTGTGGTAAATAATATTAGAAAGGGGATAA : 14110  
14120 \* 14140 \* 14160 \* 14180 \* 14200 **LR1** \* 14220 \* 14240 \* 14260 \* 14280 \*  
Pohi (14818 : **AGGTAGATGTAAGTAGATTGGTTGTAGGATAGAAATCTCTAGCCAGCCCGGTGTGTTTGTGGGGGGGGAGAGAGGTTGTGGTAAATAATATTAGAAAGGGGATAAAGGTAGATGTAAGTAGTGGTTTGTAGGATAGAAATCTCTAGCCAGCC : 14280**  
\* 14300 \* **LR1** 14320 \* 14340 \* 14360 \* 14380 \* 14400 \* 14420 \* 14440 \*  
Pohi (14818 : **CCGGTGTGTTTGTGGGGGGGGAGAGAGGTTGTGGTAAATAATATTAGAAAGGGGATAAAGGTAGATGTAAGTAGTGGTTTGTGGGATAGAAATCTCTAGCCAGCCCGGTGTGTTTGTGGGGGGGGAGAGGAGGTTGTGGTAAATAATATTAG : 14450**  
14460 \* 14480 \* 14500 \* 14520 \* 14540 **LR1** \* 14560 \* 14580 \* 14600 \* 14620 \*  
Pohi (14818 : **GAAGGGATAAAGGTAGATGTAAGTAGATTGGTTGTAGGATAGAAATCTCTAGCCAGCCCGGTGTGTTTGTGGGGGGGGAGAGGAGGTTGTGGTAAATAATATTAGAAAGGGGATAAAGGTAGATGTAAGTAGTGGTTTGTAGGATAGAAATCTC : 14620**  
\* 14640 \* 14660 \* 14680 \* 14700 \* 14720 \* 14740 \* 14760 \* 14780 \*  
Pohi (14818 : **CTAGCCAGCCCGGTGTGTTTGTGGGGGGGGAGAGAGGTTGTGGTAAATAATATTAGAAAGGGGATAAAGGTAGATGTAAGTAGTGGTTTGTAGGATAGAAATCTCTAGCCAGCCATTATTATTGTGGCGTTT** : 14790  
14800 \* **LR1**  
Pohi (14818 : TGTGAGCGTTTTTTTTGTGGCTGGAA
